# Supplementary material for: Laboratory Findings in Patients with Probable Dengue Diagnosis from an Endemic Area in Colombia in 2018
Source: MDPI journal article supplement (doi:10.3390/v13071401), 2021-07-19
Supplement: s1 [file s1]

### Supplementary Tables

Table S1. PCR-based test results of samples with “probable dengue fever “diagnosis.

| RT-PCR       | n          | %           |
|--------------|------------|-------------|
| Positive     | 80         | 71%         |
| Negative     | 33         | 29%         |
| <b>TOTAL</b> | <b>113</b> | <b>100%</b> |

Table S2. DENV serotype found in samples positive by RT-PCR

| DENV serotype | n         | %           |
|---------------|-----------|-------------|
| DENV 2        | 40        | 58%         |
| DENV 1        | 24        | 35%         |
| DENV 4        | 3         | 4%          |
| DENV 3        | 2         | 3%          |
| <b>TOTAL</b>  | <b>69</b> | <b>100%</b> |
